# Supplementary material for: Sensitive and selective electrochemical sensing of l-cysteine based on a caterpillar-like manganese dioxide–carbon nanocomposite
Source: Royal Society of Chemistry journal article supplement (doi:10.1039/c0cp00980f), 2010-11-23

## **Supplementary Information for:**

# **Sensitive and selective electrochemical sensing of L-cysteine based on caterpillar-like manganese dioxide-carbon nanocomposite**

Chunhui Xiao, Jinhua Chen\*, Bo Liu, Xiaochen Chu, Liang Wu, Shouzhuo Yao

*State Key Laboratory of Chemo/Biosensing and Chemometrics, College of Chemistry and  
Chemical Engineering, Hunan University, Changsha, 410082, P.R. China*

E-mail address: [chenjinhua@hnu.edu.cn](mailto:chenjinhua@hnu.edu.cn)

**Figure S1.** Typical HRTEM image of MnO<sub>2</sub>-C nanocomposite

**Figure S2.** Cyclic voltammograms recorded at MnO<sub>2</sub>-C/Chit/GC electrode in borate saline buffer with 0.1 mM L-cysteine and pH value of 7.4, 7.8, 8.2, 8.6, 9.0. Scan rate, 100 mV.s<sup>-1</sup>.

**Figure S3.** Cyclic Voltammograms recorded at MnO<sub>2</sub>-C/Chit/GC electrode in (a) borate saline buffer (pH=7.8) and (b) phosphate buffer solution (pH=7.8) with (solid lines) and without (dotted lines) 0.1 mM L-cysteine. Scan rate, 100 mV.s<sup>-1</sup>.

**Figure S1**

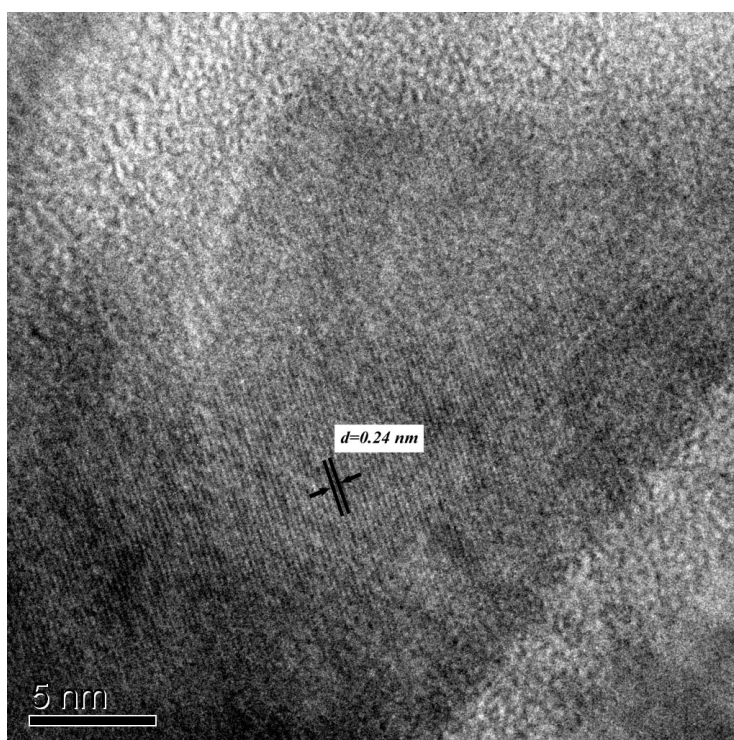

**Figure S2**

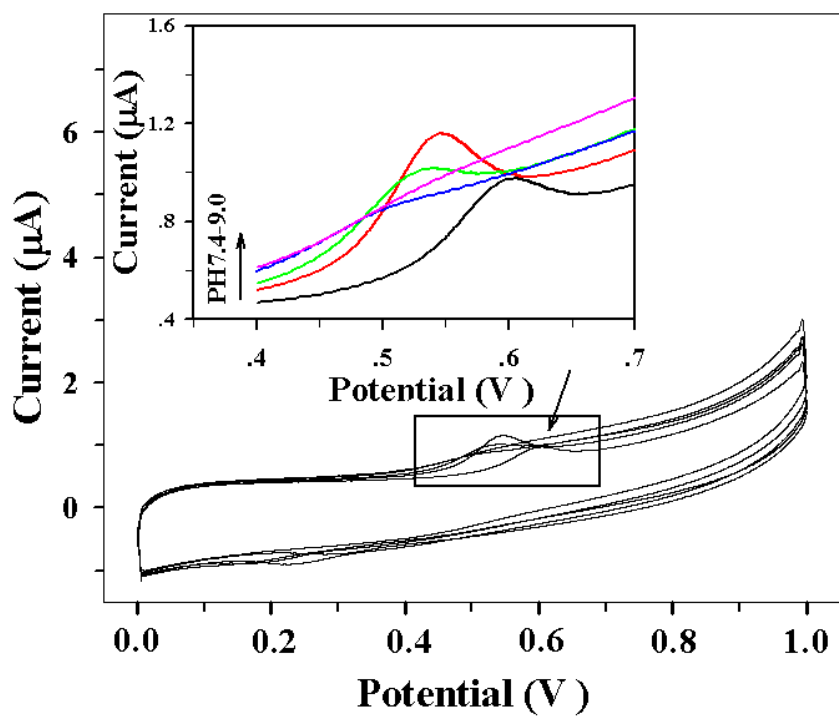

Figure S3

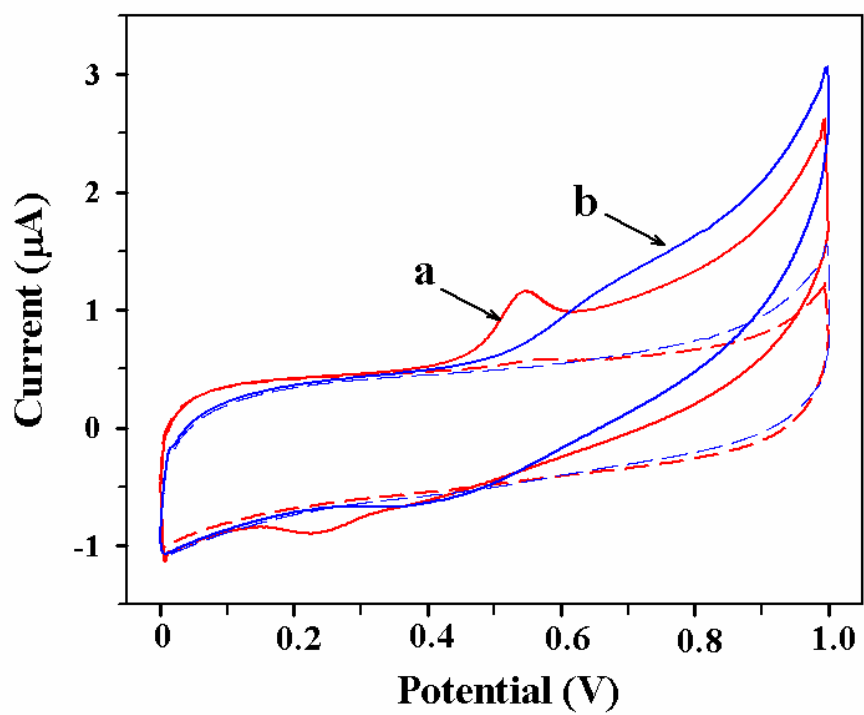

Supplement: c0cp00980f.pdf [file c0cp00980f.pdf]
